# Supplementary material for: RYBP stimulates PRC1 to shape chromatin-based communication between Polycomb repressive complexes
Source: eLife journal article supplement (doi:10.7554/elife.18591), 2016-10-05
Supplement: supp [file elife-18591-supp-v1.zip]

Archive with 15 entries (15 files):
- elife_poa_e18591_Figure_3_figure_supplement_1.pdf
- elife_poa_e18591_Figure_9_figure_supplement_1.pdf
- elife_poa_e18591_Figure_6_figure_supplement_2.pdf
- elife_poa_e18591_Figure_1_figure_supplement_1.pdf
- elife_poa_e18591_Figure_8_figure_supplement_1.pdf
- elife_poa_e18591_figure_5_figure_supplement_1.pdf
- elife_poa_e18591_Figure_8_figure_supplement_2.pdf
- elife_poa_e18591_Figure_6_figure_supplement_1.pdf
- elife_poa_e18591_Figure_4_figure_supplement_1.pdf
- elife_poa_e18591_Source_Code.pl
- elife_poa_e18591_Figure_9_figure_supplement_2.pdf
- elife_poa_e18591_Figure_9_figure_supplement_3.pdf
- elife_poa_e18591_Source_Code.pl
- elife_poa_e18591_Figure_2_figure_supplement_1.pdf
- elife_poa_e18591_Figure_7_figure_supplement_1.pdf
