# Supplementary material for: RYBP stimulates PRC1 to shape chromatin-based communication between Polycomb repressive complexes
Source: eLife journal article supplement (doi:10.7554/elife.18591), 2016-10-05
Supplement: supp [file elife-18591-supp-v1.zip › elife_poa_e18591_Figure_6_figure_supplement_2.pdf]

A

**RING1B Unaffected**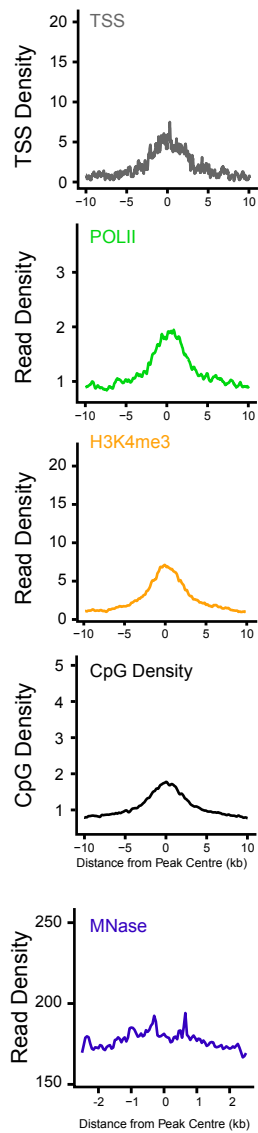

B

**RING1B Sig. Decrease**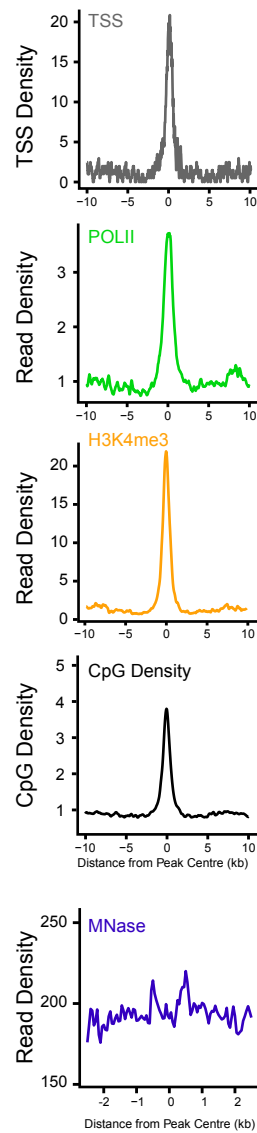

C

**RING1B Unaffected**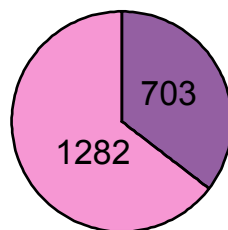**RING1B Sig. Decrease**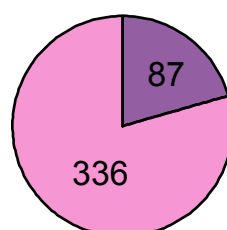

PRC1 Cluster

Shared

Var. Enriched

Figure 6 - Figure Supplement 2
