# Supplementary figures and images for: RYBP stimulates PRC1 to shape chromatin-based communication between Polycomb repressive complexes
Source: eLife journal article supplement (doi:10.7554/elife.18591), 2016-10-05

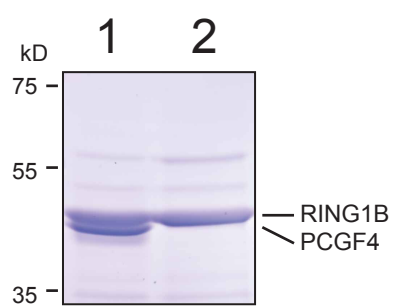

Figure 3 - Figure Supplement 1

Supplement: supp [file elife-18591-supp-v1.zip › elife_poa_e18591_Figure_3_figure_supplement_1.pdf]

A

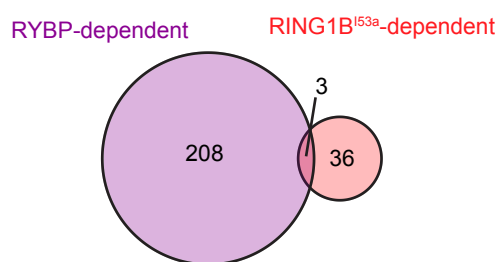

B

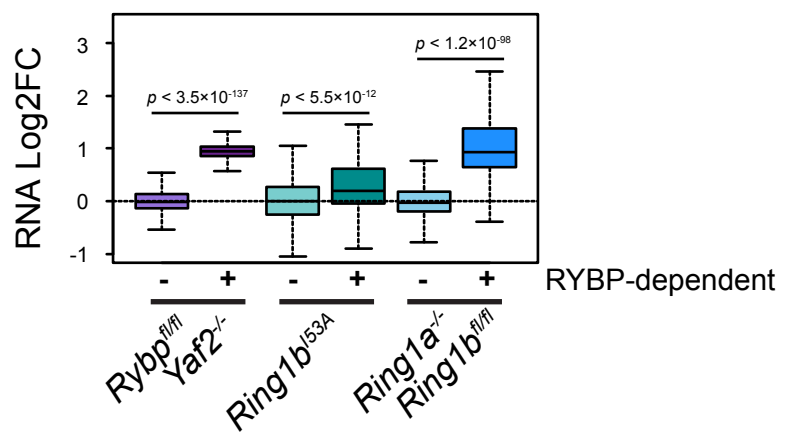

Figure 9 - Figure Supplement 1

Supplement: supp [file elife-18591-supp-v1.zip › elife_poa_e18591_Figure_9_figure_supplement_1.pdf]

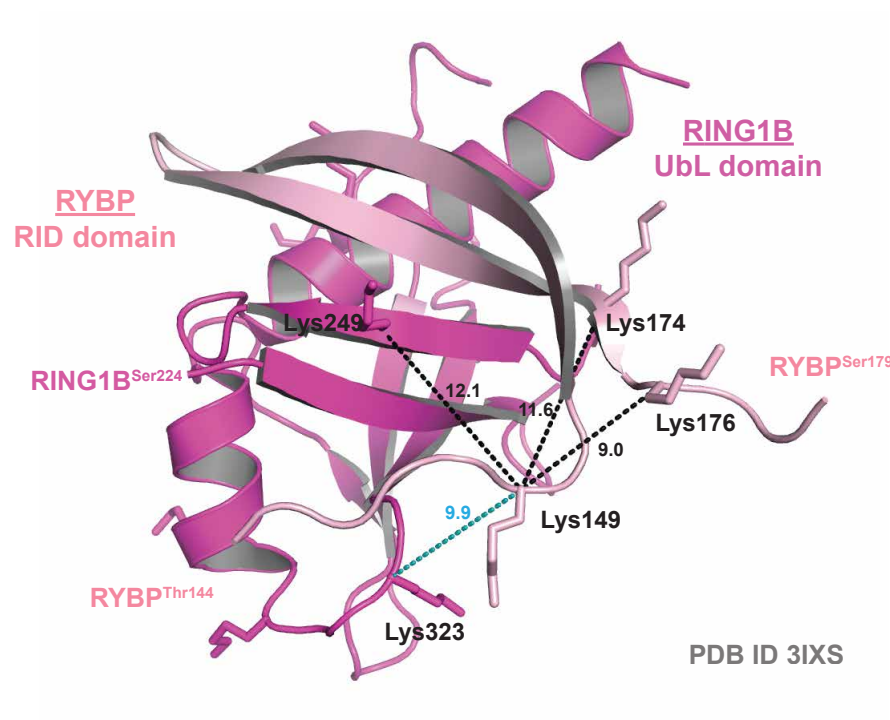

Figure 1 - Figure Supplement 1

Supplement: supp [file elife-18591-supp-v1.zip › elife_poa_e18591_Figure_1_figure_supplement_1.pdf]

A

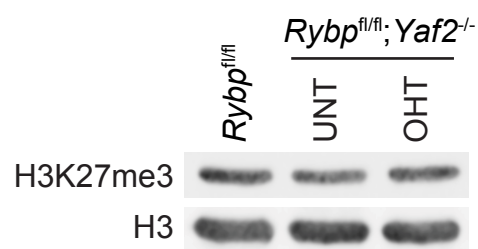

B

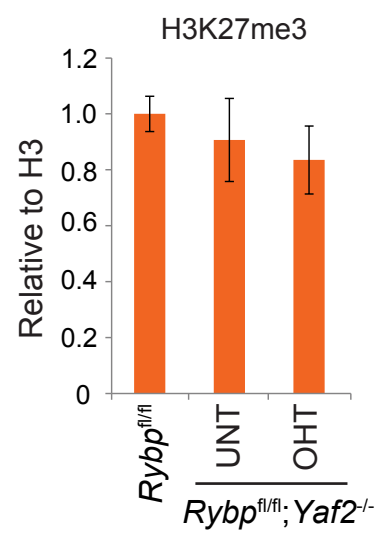

Figure 8 - Figure Supplement 1

Supplement: supp [file elife-18591-supp-v1.zip › elife_poa_e18591_Figure_8_figure_supplement_1.pdf]

A

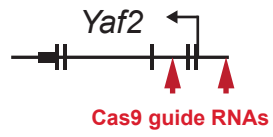

B

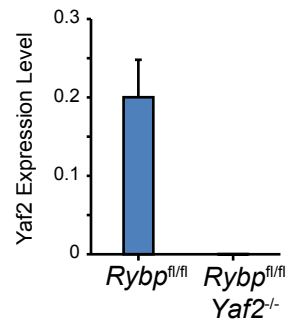

C

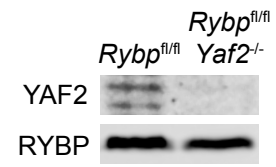

Figure 5 - Figure Supplement 1

Supplement: supp [file elife-18591-supp-v1.zip › elife_poa_e18591_figure_5_figure_supplement_1.pdf]

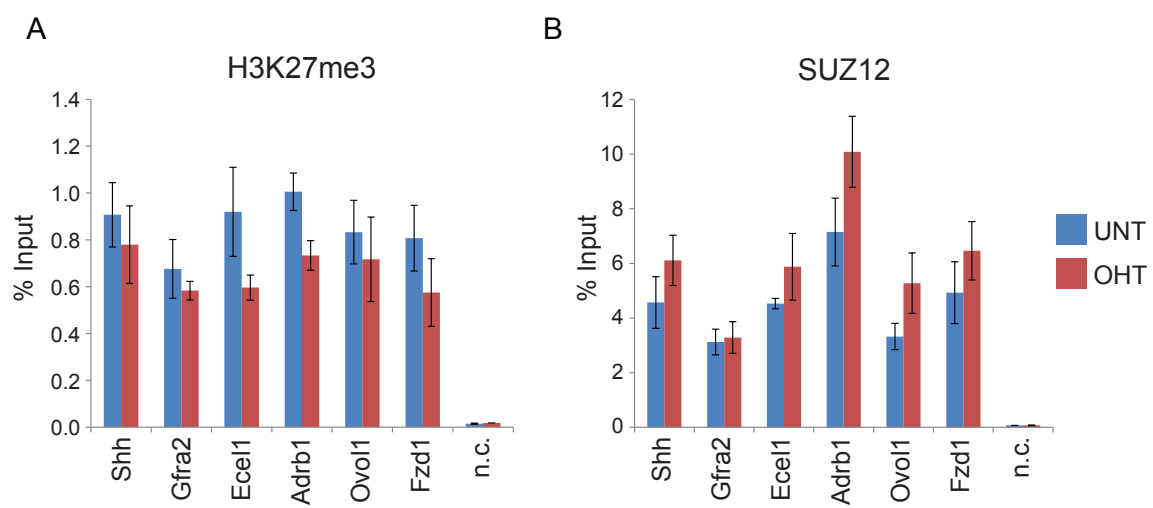

Figure 8 - Figure Supplement 2

Supplement: supp [file elife-18591-supp-v1.zip › elife_poa_e18591_Figure_8_figure_supplement_2.pdf]

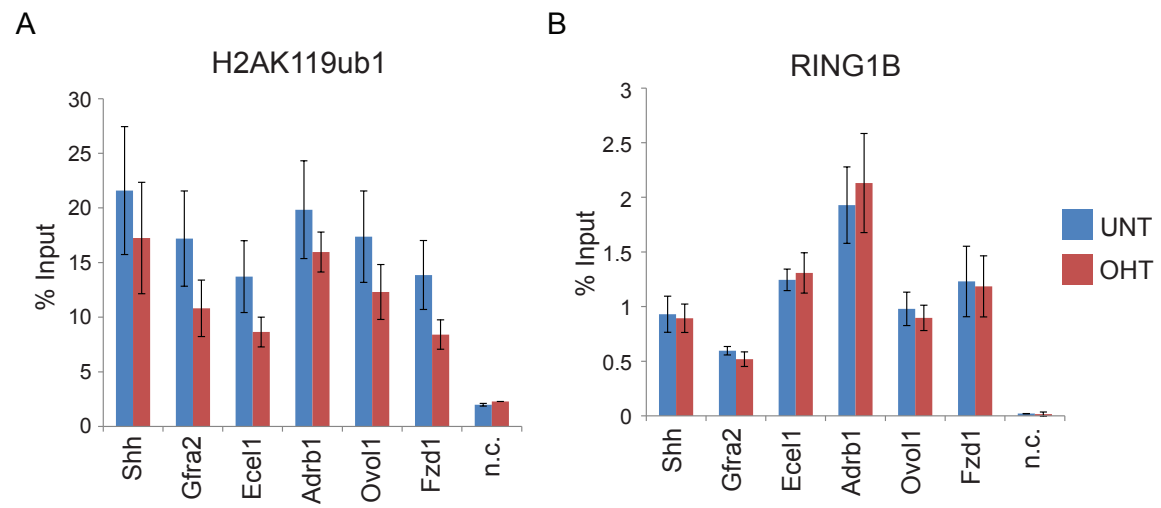

Figure 6 - Figure Supplement 1

Supplement: supp [file elife-18591-supp-v1.zip › elife_poa_e18591_Figure_6_figure_supplement_1.pdf]

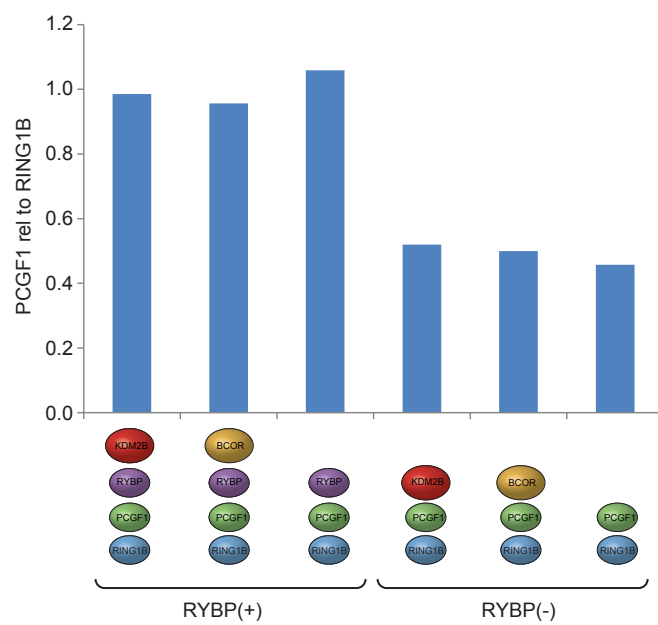

Figure 4 - Figure Supplement 1

Supplement: supp [file elife-18591-supp-v1.zip › elife_poa_e18591_Figure_4_figure_supplement_1.pdf]

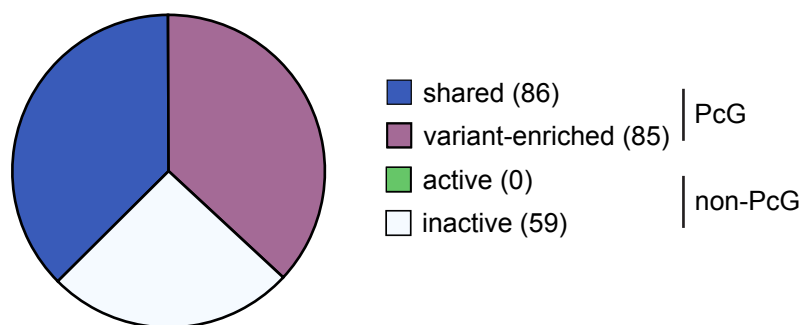

Figure 9 - Figure Supplement 2

Supplement: supp [file elife-18591-supp-v1.zip › elife_poa_e18591_Figure_9_figure_supplement_2.pdf]

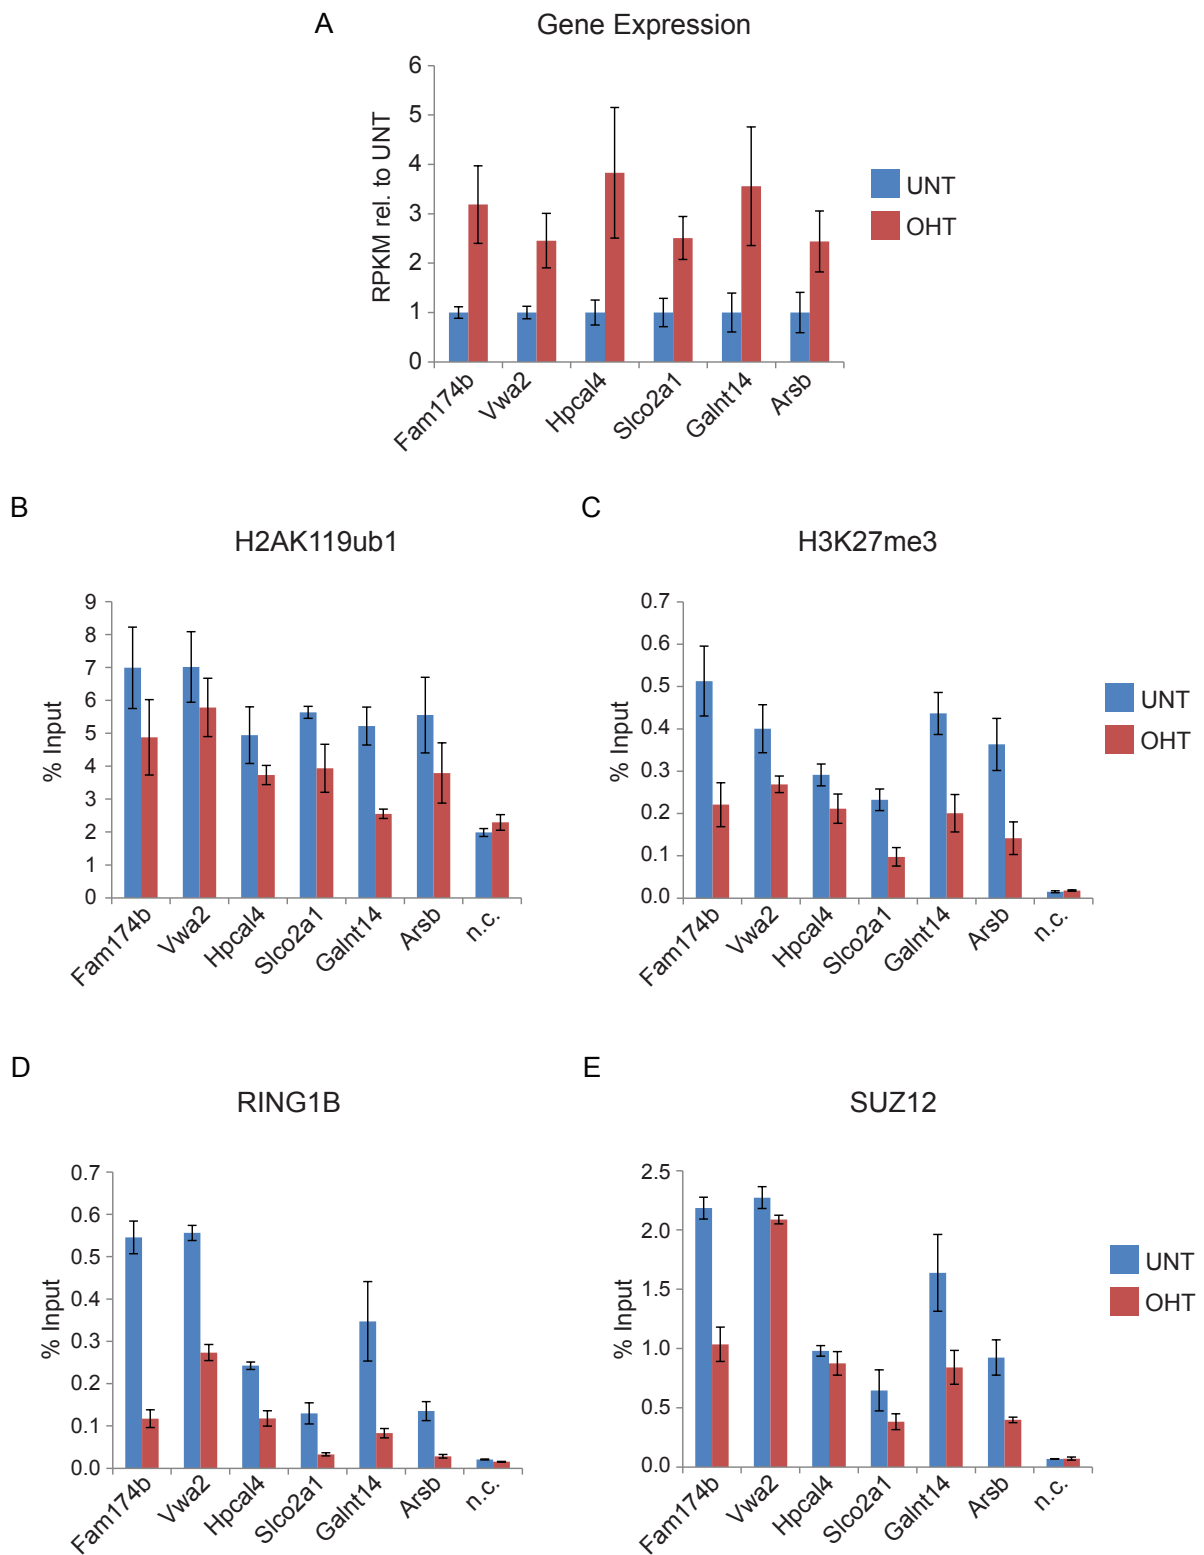

Figure 9 - Figure Supplement 3

Supplement: supp [file elife-18591-supp-v1.zip › elife_poa_e18591_Figure_9_figure_supplement_3.pdf]

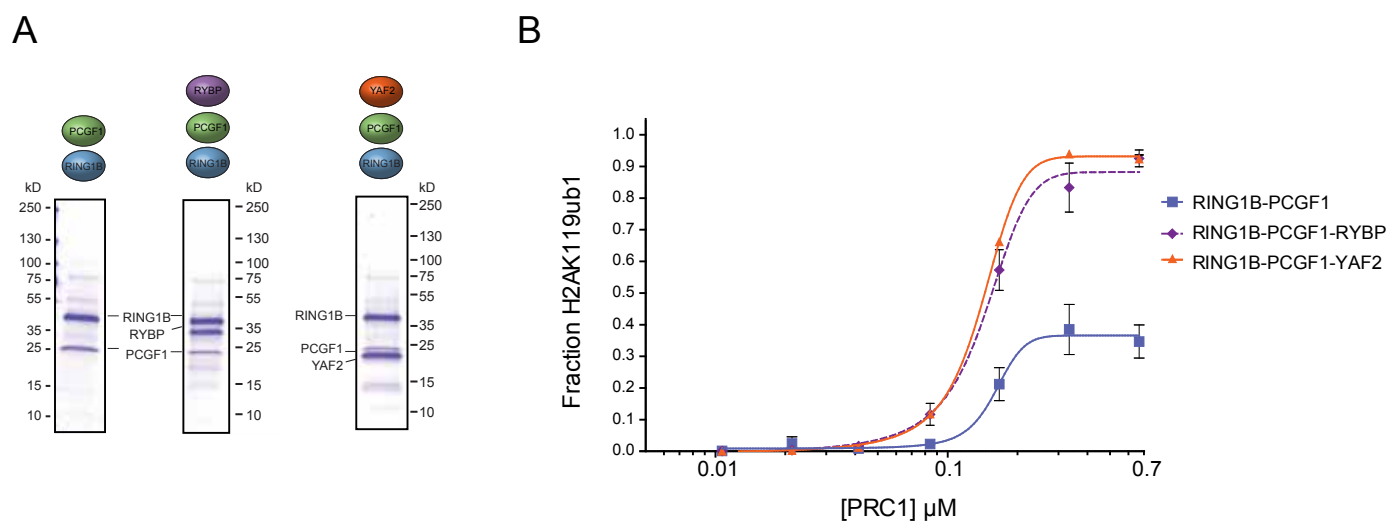

Figure 2 - Figure Supplement 1

Supplement: supp [file elife-18591-supp-v1.zip › elife_poa_e18591_Figure_2_figure_supplement_1.pdf]

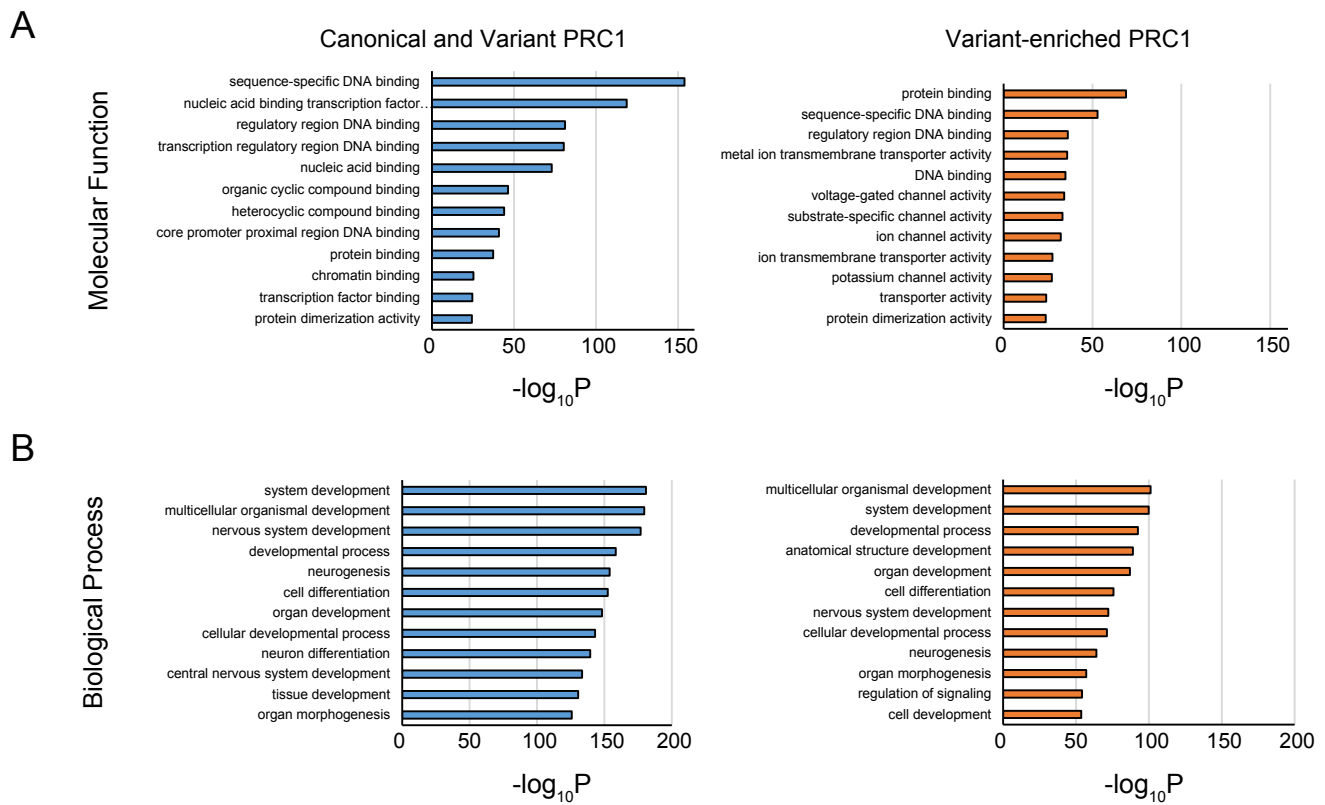

Figure 7 - Figure Supplement 1

Supplement: supp [file elife-18591-supp-v1.zip › elife_poa_e18591_Figure_7_figure_supplement_1.pdf]

A

B

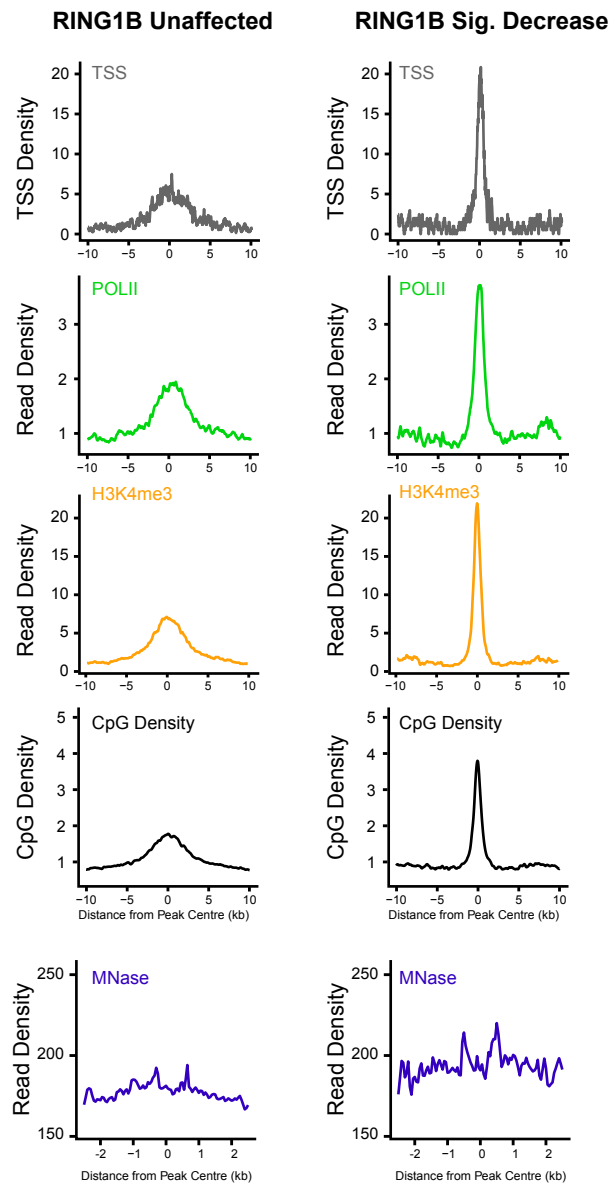

C

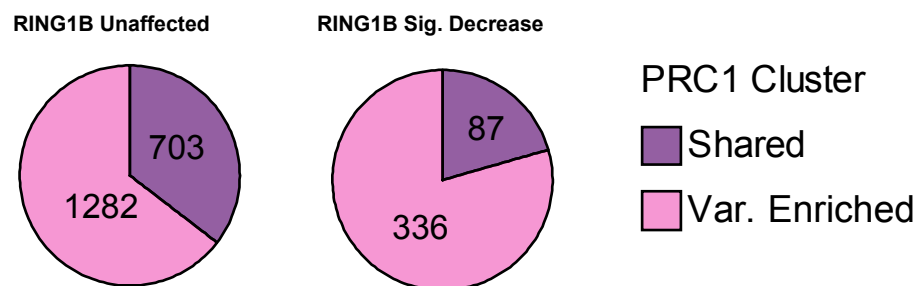

Figure 6 - Figure Supplement 2

Supplement: supp [file elife_poa_e18591_Figure_6_figure_supplement_2.pdf › elife_poa_e18591_Figure_6_figure_supplement_2.pdf]
